# Supplementary material for: Gold nanoparticle-catalyzed uranine reduction for signal amplification in fluorescent assays for melamine and aflatoxin B1
Source: Royal Society of Chemistry journal article supplement (doi:10.1039/c5an01300c), 2015-01-01
Supplement: c5an01300c1.pdf [file c5an01300c1.pdf]

## Electronic Supplementary Information

### Gold nanoparticle-catalyzed uranine reduction for signal amplification in fluorescent assays for melamine and aflatoxin B1

*Xu Wang,<sup>a</sup> Jutta Pauli,<sup>b</sup> Reinhard Niessner,<sup>a</sup> Ute Resch-Genger<sup>b</sup> and Dietmar Knopp\*<sup>a</sup>*

<sup>a</sup> Chair for Analytical Chemistry, Institute of Hydrochemistry, Technische Universität München, Marchioninistr. 17, D-81377 München, Germany.

<sup>b</sup> BAM Bundesanstalt für Materialforschung und -prüfung, Richard-Willstätter-Str. 11, 12489 Berlin, Germany.

\* Corresponding author: dietmar.knopp@ch.tum.de

#### Characterization of AuNPs

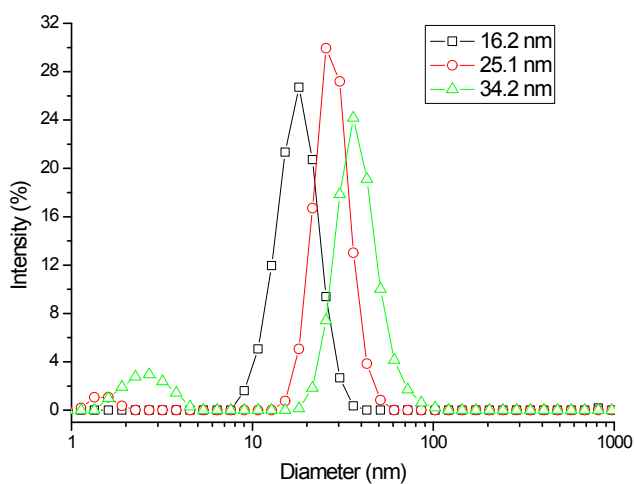

**Fig. S1** Size distribution of the prepared AuNPs determined by DLS.

## AuNP-catalyzed uranine reduction

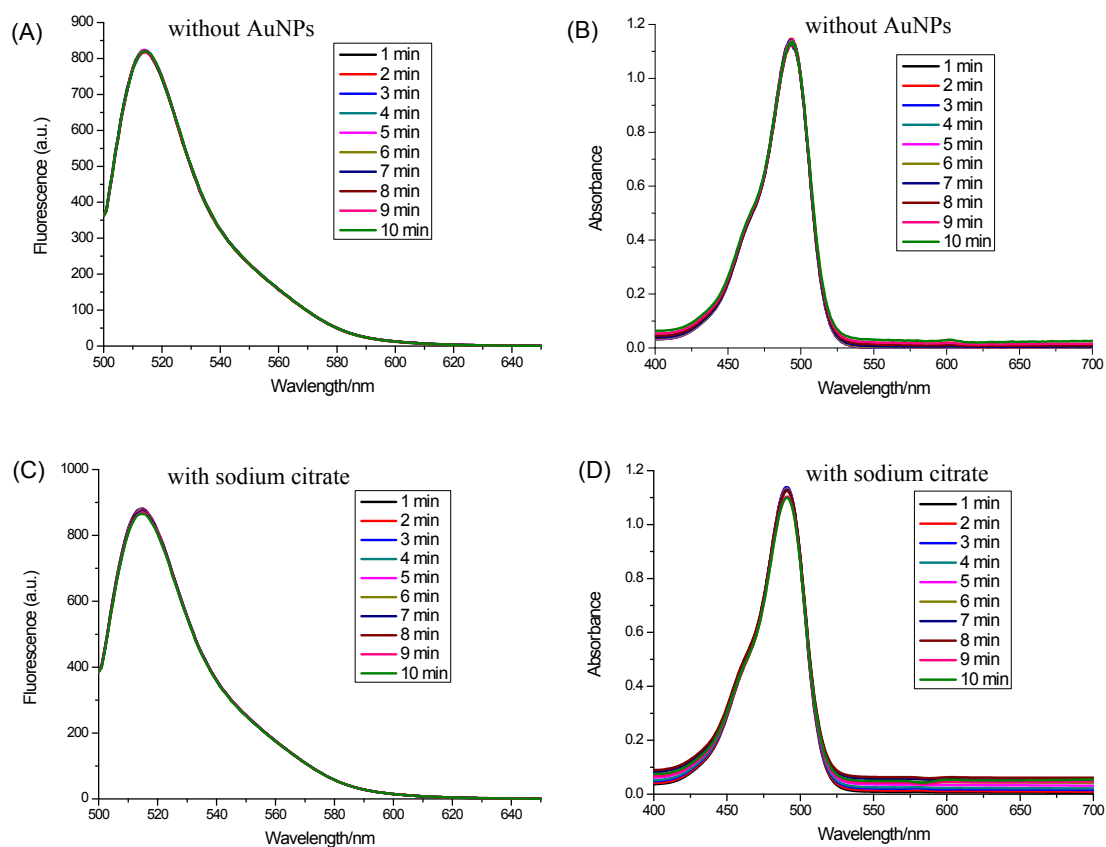

**Fig. S2** (A) Time-dependent fluorescence spectra of uranine/NaBH<sub>4</sub> (8  $\mu$ M/10 mM) and (B) UV-vis absorption spectra of uranine/NaBH<sub>4</sub> solution (20  $\mu$ M/10 mM) in the absence of AuNPs. (C) Time-dependent fluorescence spectra of uranine/NaBH<sub>4</sub> (8  $\mu$ M/10 mM) and (D) Absorption spectra of uranine/NaBH<sub>4</sub> solution (20  $\mu$ M/10 mM) after addition of 20  $\mu$ L 1 wt % sodium citrate.

## The effect of surface coating

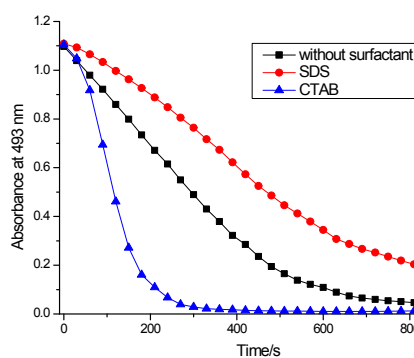

**Fig. S3** Time-dependent changes of the absorbance of an uranine/ $\text{NaBH}_4$  solution ( $20 \mu\text{M}/10 \text{mM}$ ) after addition of AuNPs with different surface coatings. The absorbance was recorded at  $493 \text{nm}$ , i.e., at the absorption maximum of the emissive dianionic form of uranine.

### The effect of $\text{NaBH}_4$

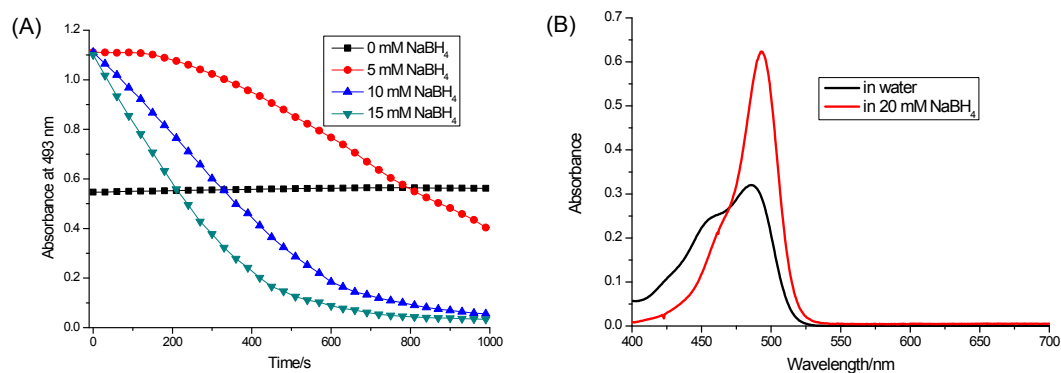

**Fig. S4** (A) Effect of different  $\text{NaBH}_4$  concentrations on the catalytic reduction of uranine ( $20 \mu\text{M}$  uranine in 3 mL water, addition of  $\text{NaBH}_4$  at different concentrations followed by addition of  $20 \mu\text{L}$  of 16-nm citrate-stabilized AuNPs). (B) Absorption spectra of uranine ( $10 \mu\text{M}$ ) in water and in aqueous  $\text{NaBH}_4$  ( $20 \text{mM}$ ) solution.

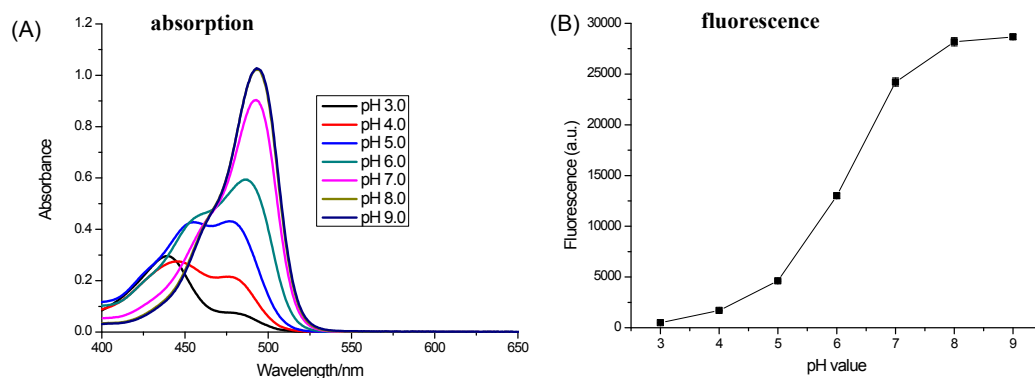

**Fig. S5** Effect of pH value on the absorption spectra and fluorescence intensity of uranine. Conditions:  $20 \mu\text{M}$  uranine in buffer with different pH value. The fluorescence was excited at  $485 \text{nm}$  and recorded at  $528 \text{nm}$ .

## The effect of concentration, size and dispersion state of AuNPs

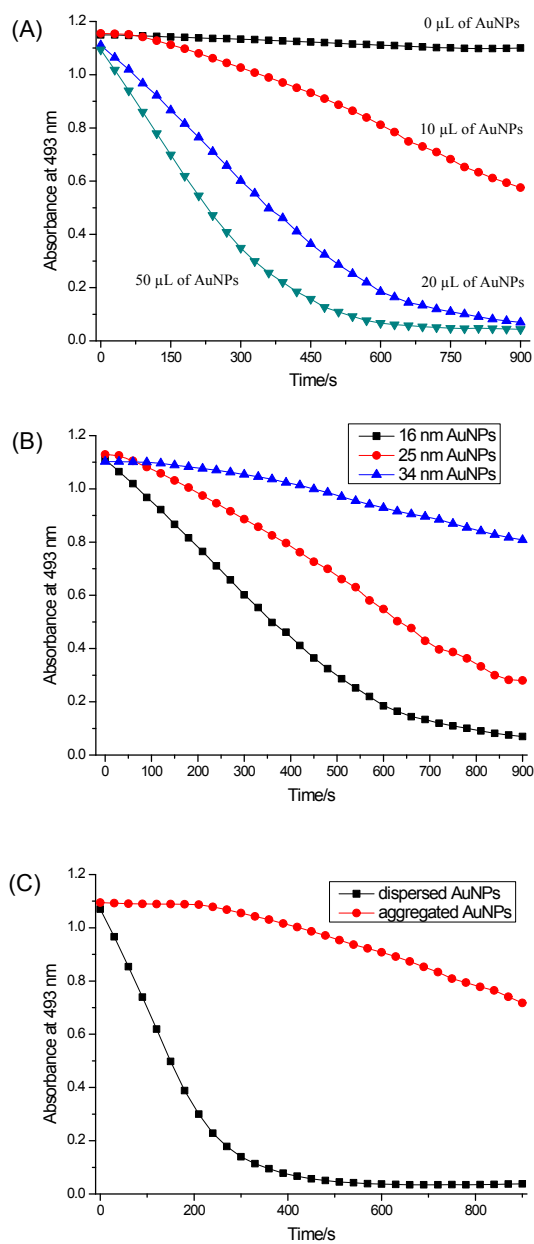

**Fig. S6** (A) Effect of AuNP concentration (16-nm AuNPs were used). (B) Influence of AuNP size.  $[\text{Au}] = 0.31$  mg/L. (C) Comparison of catalytic activity between dispersed and aggregated AuNPs. Conditions: 20  $\mu\text{M}$  uranine and 10 mM  $\text{NaBH}_4$  in 3 mL water, and AuNPs with different volumes, sizes or dispersion states were added.

## Detection of melamine

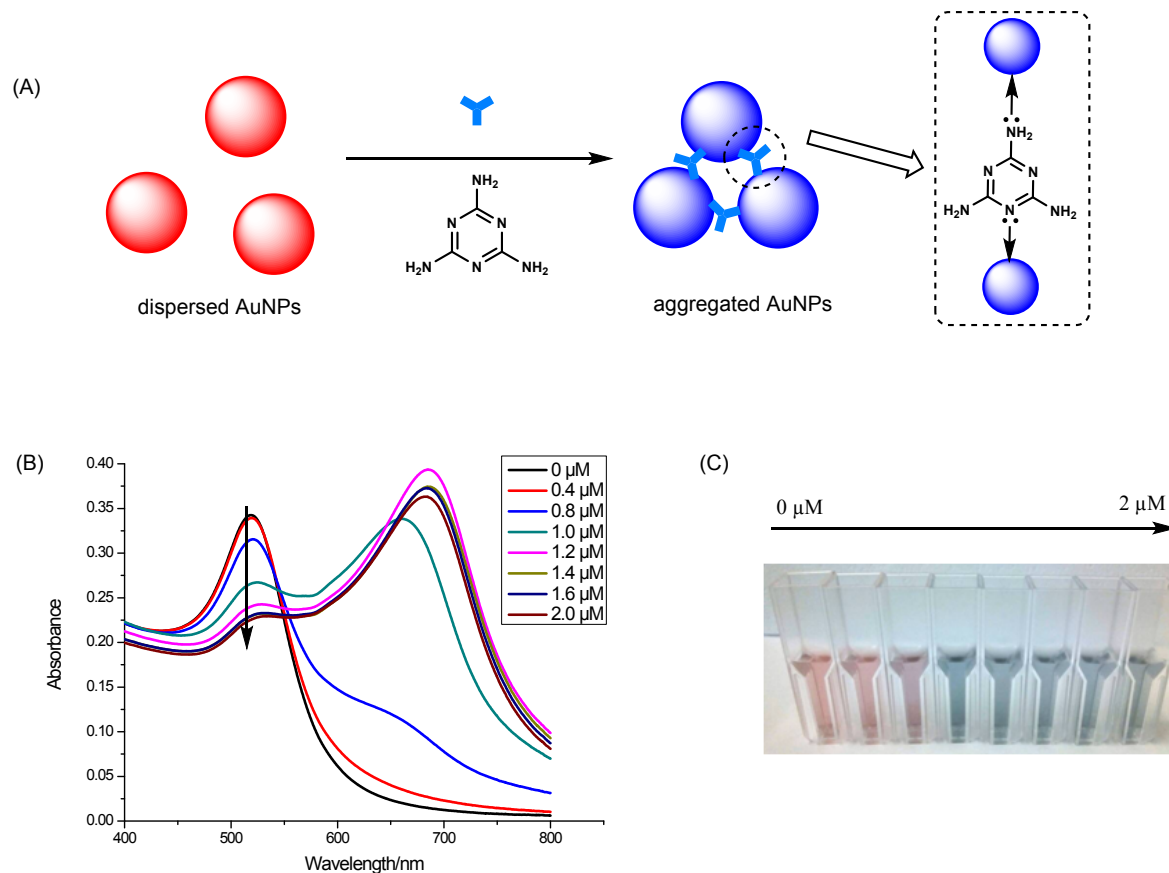

**Fig. S7** (A) Schematic illustration of the aggregation of AuNPs induced by melamine. (B) Absorption spectra of AuNPs after addition of melamine with different concentrations and (C) Corresponding image.  $[\text{Au}] = 9.46 \text{ mg/L}$ .

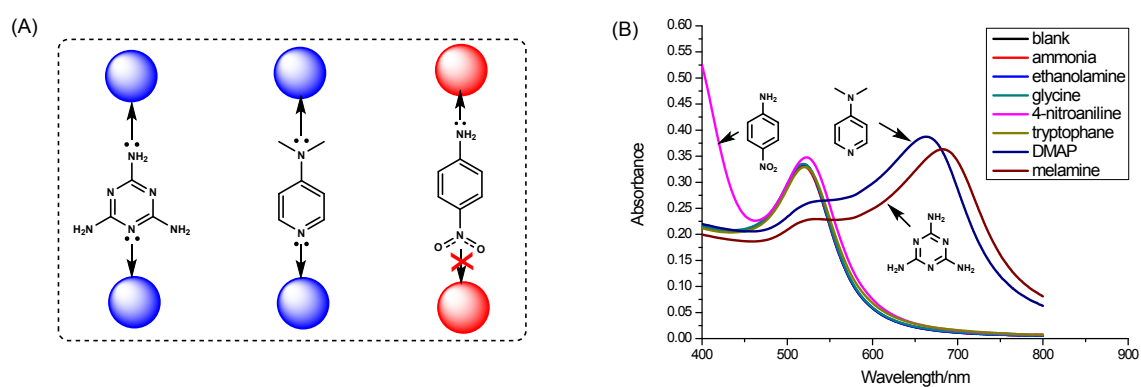

**Fig. S8** (A) Schematic illustration of the interactions between AuNPs and amino compounds. (B) Absorption spectra of AuNPs in the presence of different amino compounds.  $[\text{Au}] = 9.46 \text{ mg/L}$ .

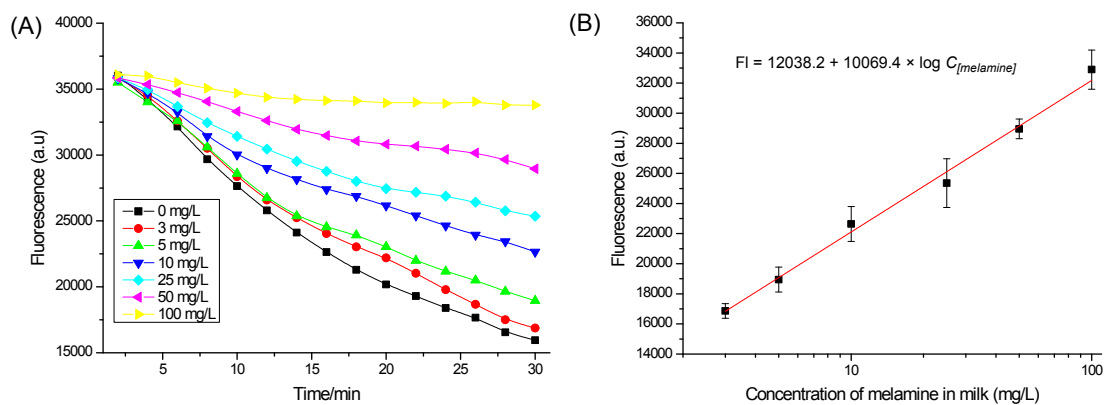

**Fig. S9** Kinetic-based fluorescent assay for melamine in milk ( $\lambda_{ex}/\lambda_{em} = 485/528$  nm). (A) Time-dependent fluorescence changes, which correspond to different concentrations of melamine. (B) Dependence of the fluorescence intensity at 30 min on melamine concentration in milk. The fluorescence was excited at 485 nm and recorded at 528 nm.

### Detection of AFB1

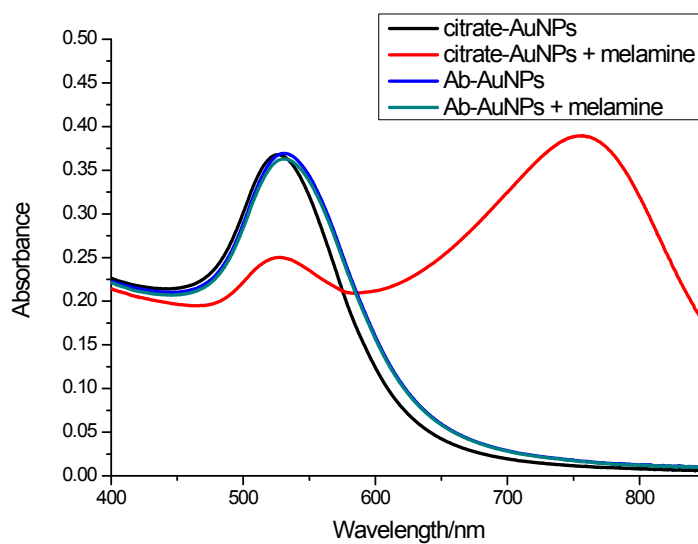

**Fig. S10** Absorption spectra of citrate-AuNPs and Ab-AuNPs in the absence/presence of 2  $\mu$ M melamine.  $[Au] = 9.46$  mg/L.

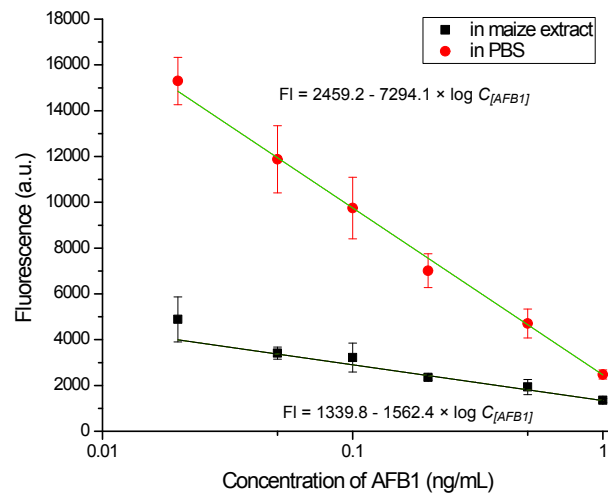

**Fig. S11** Dose-response curves of the developed fluorescent immunoassays for the detection of AFB1 in maize extract and in PBS under similar reaction conditions.

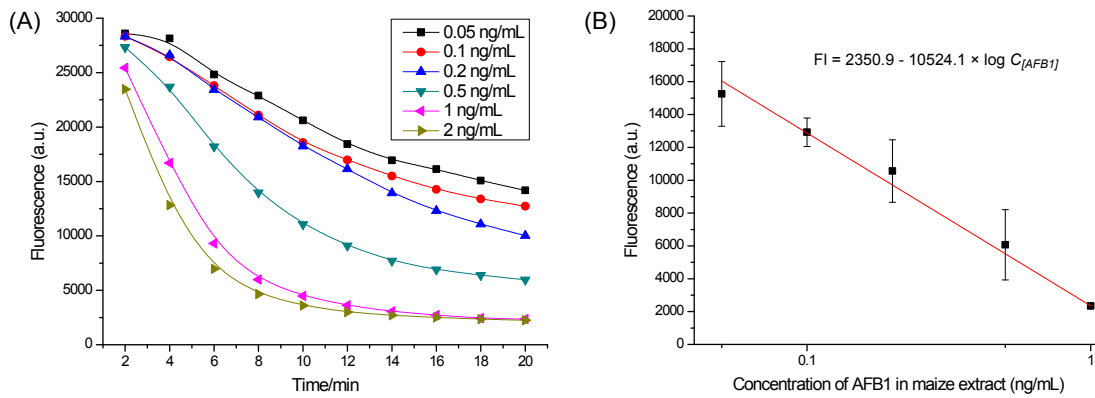

**Fig. S12** Kinetic-based fluorescent assay for AFB1 in maize extract ( $\lambda_{ex}/\lambda_{em} = 485/528$  nm). (A) Time-dependent fluorescence changes, which correspond to different concentrations of AFB1. (B) The dependence of fluorescence intensity at 20 min on AFB1 concentration in maize extract. The fluorescence was excited at 485 nm and recorded at 528 nm.

**Table S1:** The detected results of AFB1 in pulverized maize powders and recovery rates.

| Spiked concentration (µg/kg) | After extraction and dilution (µg/L) | Detected concentration (µg/L) | Recovery rate (%) |
|------------------------------|--------------------------------------|-------------------------------|-------------------|
| 8                            | 0.10                                 | 0.104 ± 0.022                 | 104.0             |
| 40                           | 0.50                                 | 0.597 ± 0.084                 | 119.4             |
| 80                           | 1.00                                 | 0.847 ± 0.103                 | 84.7              |
